## **Cellular, physiological, and behavioral validation of a CRFR1:Cre<sup>-td</sup>Tomato transgenic rat for use in basic neuroscience research**

Marcus M. Weera<sup>1\*</sup>, Abigail E. Agoglia<sup>2</sup>, Douglass E<sup>2</sup>, Zhiying Jiang<sup>3</sup>, Shivakumar Rajamanikam<sup>3</sup>, Rosetta S. Shackett<sup>1</sup>, Nicholas J. Justice<sup>3,4</sup>, Melissa A. Herman<sup>2,5</sup>, & Nicholas W. Gilpin<sup>1,6,7,8</sup>

<sup>1</sup>*Department of Physiology, Louisiana State University Health Sciences Center, New Orleans, LA, USA*

<sup>2</sup>*Department of Pharmacology, University of North Carolina, Chapel Hill, NC, USA*

<sup>3</sup>*Institute of Molecular Medicine, University of Texas Health Sciences Center, Houston, TX, USA*

<sup>4</sup>*Department of Integrative Biology and Pharmacology, McGovern Medical School at UT Health, Houston, TX, USA.*

<sup>5</sup>*Bowles Center for Alcohol Studies, University of North Carolina, Chapel Hill, NC, USA*

<sup>6</sup>*Neuroscience Center of Excellence, Louisiana State University Health Sciences Center, New Orleans, LA, USA.*

<sup>7</sup>*Alcohol & Drug Abuse Center of Excellence, Louisiana State University Health Sciences Center, New Orleans, LA, USA.*

<sup>8</sup>*Southeast Louisiana VA Healthcare System (SLVHCS), New Orleans, LA, USA.*

\*Corresponding author: [mweera@lsuhsc.edu](mailto:mweera@lsuhsc.edu)

## Abstract

Corticotropin-releasing factor type-1 receptors (CRFR1) are important for mediating the endocrine stress response, modulating synaptic transmission in the central nervous system, and are involved in mediating behaviors that include stress reactivity, anxiety, fear, pain, motivation, and addiction. Understanding the precise role of specific CRFR1 neuronal populations and circuits/networks in CRFR1-relevant behavior is limited by a lack of genetic access to CRFR1-expressing cells in rats. Here, we describe the generation and validation of a transgenic CRFR1:Cre-<sup>td</sup>Tomato rat line on a Wistar background. Within the central amygdala (CeA) of male and female CRFR1:Cre-<sup>td</sup>Tomato rats, we show that *Crfr1* and *Cre* mRNA expression are highly colocalized and that CRFR1:Cre-<sup>td</sup>Tomato cells are largely confined to the medial subdivision of the CeA, consistent with CRF expression patterns in outbred animals. Using <sup>td</sup>Tomato fluorescent protein as a reporter, we measured membrane properties, inhibitory synaptic transmission, and CRF sensitivity in CeA CRFR1-expressing cells and found that these properties were similar to those previously reported in CRFR1:Cre mice, and that CeA CRFR1 neurons were excited by exogenous CRF application. We also show that stimulatory Gq-coupled DREADD receptors can be targeted to CeA CRFR1 cells via Cre-dependent expression and that these cells can be activated by clozapine-n-oxide (CNO) *in vitro* and *in vivo*. Finally, we report that DREADD-mediated activation of CeA CRFR1 cells increases anxiety-like behavior and increases nocifensive responses. Our results demonstrate the utility of this novel CRFR1:Cre-<sup>td</sup>Tomato transgenic rat line for studying the anatomy, physiology, and behavioral function of select CRFR1-expressing cell populations and circuits under normal conditions and in rat models of human disease.

## Introduction

Corticotropin-releasing factor (CRF) is a 41 amino acid neuropeptide that acts on various cell populations in the brain and elicits stress-related behavioral (e.g., anxiety) and physiological (e.g. sympathomimetic) responses (Henckens et al., 2016). In the hypothalamic-pituitary-adrenal (HPA) axis, CRF released by neurons in the paraventricular nucleus of the hypothalamus (PVN) into the hypophyseal portal system stimulates adrenocorticotrophic hormone (ACTH) release from the pituitary, which in turn stimulates release of glucocorticoids from the adrenal cortex. Glucocorticoids released into the circulatory system serve as effectors of the HPA axis by modulating various physiological (e.g., cardiovascular, respiratory, and immune) functions (Smith and Vale, 2006). Extrahypothalamic CRF neurons are located in many brain areas that modulate affective states and behaviors, such as the amygdala, cortex, hippocampus, midbrain, and locus coeruleus (Peng et al., 2017). Among these brain areas, the extended amygdala, particularly the central amygdala (CeA) and bed nucleus of stria terminalis (BNST), contain the highest densities of CRF neurons (Peng et al., 2017).

CRF type-1 receptors (CRFR1) are  $G_s$ -coupled metabotropic receptors that are highly expressed in brain areas that contain high densities of CRF fibers and/or CRF neurons, including the CeA, BNST, and medial amygdala. CRF signaling via CRFR1 modulates neurophysiological processes underlying stress reactivity, anxiety-related behaviors, learning and memory processes including fear acquisition and/or expression, pain signaling, and addiction-related behaviors (see reviews by Dedic et al., 2018, Henckens et al., 2016). Therefore, elucidation of the circuit-specific and cell-specific mechanisms by which CRFR1 signaling mediates these processes represents an important avenue of research for understanding behaviors related to stress, anxiety, fear, pain, and addiction.

The central amygdala (CeA) is a key nucleus in modulating affective states and behaviors related to stress, anxiety, fear, pain, and addiction (Gilpin et al., 2015). Functionally, the CeA serves as a major output nucleus of the amygdala and can be anatomically divided into lateral (CeAl) and medial (CeAm) subdivisions (Duvarci and Pare, 2014). In mice and rats, CRF-expressing (CRF<sup>+</sup>) neurons are densely localized to the CeAl, whereas CRFR1-expressing (CRFR1<sup>+</sup>) neurons are mostly localized to the CeAm (Day et al., 1999; Jolkkonen and Pitkanen, 1998; Justice et al., 2008; Pomrenze et al., 2015). In addition to receiving CRF input from CRF<sup>+</sup> neurons in the CeAl, the CeAm receives CRF inputs from distal brain areas such as the bed nucleus of stria terminalis (BNST) (Dabrowska et al., 2016) and dorsal raphe nucleus (Commons et al., 2003). CeA CRFR1 signaling plays an important role in modulating affective states and behaviors. For example, pharmacological blockade of CeA CRFR1 attenuates stress-induced increases in anxiety-like behavior (Henry et al., 2006), nociception (Itoga et al., 2016), and alcohol drinking (Roberto et al., 2010; Weera et al., 2020), as well as fear acquisition and expression (Sanford et al., 2017). Work using transgenic CRF and CRFR1 reporter and Cre-driver mice have shed light on the precise circuit- and cell-specific mechanisms by which CeA CRF<sup>+</sup> and CRFR1<sup>+</sup> cells mediate affective behaviors (e.g., Fadok et al., 2017; Sanford et al., 2017). However, mice have a more limited behavioral repertoire compared to rats, making the study of more complex behaviors difficult or impossible.

Here, we describe the generation of a novel CRFR1:Cre<sup>-td</sup>Tomato transgenic rat line and show that CRFR1 and Cre<sup>-td</sup>Tomato are highly co-expressed within the CeA. We recorded membrane properties, inhibitory synaptic transmission, and spontaneous firing in CeA CRFR1:Cre<sup>-td</sup>Tomato cells and show that these cells are sensitive to CRF. In addition, we show that Cre-dependent DREADD receptors can be targeted to CeA CRFR1:Cre<sup>-td</sup>Tomato cells and that DREADD

stimulation of these cells increases nociception and anxiety-like behaviors, recapitulating prior work using pharmacological strategies. This CRFR1:Cre<sup>td</sup>Tomato rat line will serve as a useful complement to existing CRFR1:Cre mice (Justice et al., 2008; Sanford et al., 2017), especially in the context of the more complex behavioral repertoire of rats relative to mice.

## Materials & Methods

### Development of CRFR1:Cre<sup>td</sup>Tomato rats

*Design of CRFR1:Cre bacterial artificial chromosome (BAC) transgene:* Please refer to **Figure 1** for a schematic of the BAC generation. The design of the CRFR1:Cre transgene for rat is similar to designs we previously used to generate CRFR1:GFP BAC transgenic mice (Justice et al., 2008) and CRFR1:Cre BAC transgenic mice, but uses BAC genomic DNA from rat (clone RNB2-336H12 from Riken Rat genomic BAC library). This clone does not contain other identified gene coding regions, reducing the likelihood of off-target transgenic expression. We obtained the RNB2-336H12 BAC clone and performed the insertion of the iCre-p2A-tdTomato sequence at the ATG start site of CRFR1 (**Fig. 1A**). To design the targeting vector, we designed 100 bp targeting arms (5' and 3') flanked by FseI sites, with internal NheI, NotI, and XhoI sites, and had this starter gene synthesized (Genewiz, South Plainfield, NJ) (**Fig. 1B**). The arms are homologous to the DNA immediately upstream of the ATG that begins translation of the CRFR1 transcript. This arm is designed such that the ATG of CRFR1 will be replaced with the ATG of Cre recombinase (**Fig. 1C**). The 3' arm is homologous to the sequence within the first intron of CRFR1, such that the transgenic sequence replaces the first exon of CRFR1 and then terminates. Between the NheI and NotI sequences, we cloned sequences encoding iCre-p2A-tdtomato-GH-pA-WPRE. iCre is a codon-optimized Cre that produces consistent Cre activity. <sup>td</sup>Tomato encodes a red fluorescent protein that allows cells expressing the transgene to be visualized. The poly A and WPRE

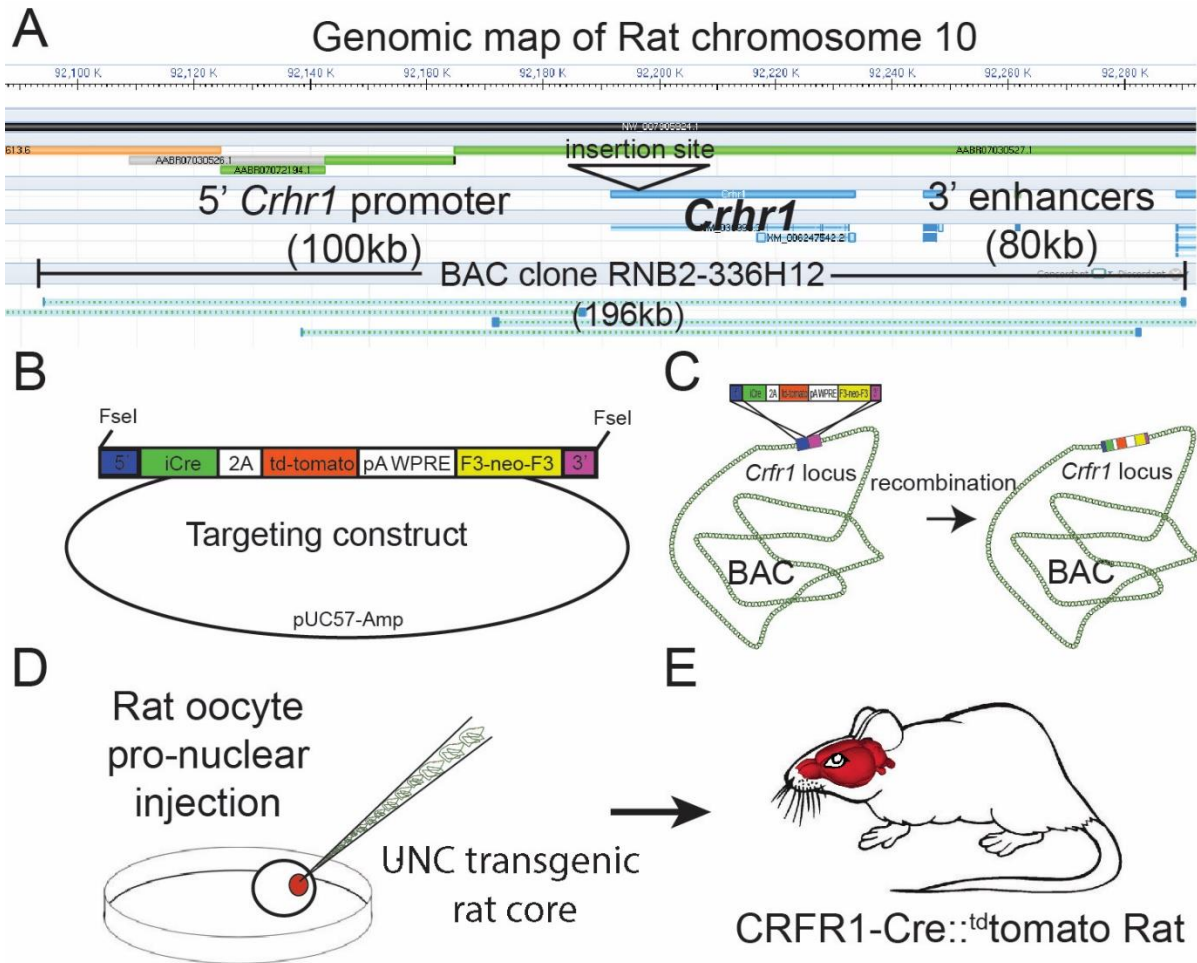

**Figure 1. Design of the CRFR1-Cre2aTom BAC transgene.** (A) *Crhr1* is located on chromosome 10 in the rat. A BAC clone containing 196kb of DNA surrounding the *Crhr1* coding region includes 100kb of upstream and 80kb of downstream DNA, where the majority of promoter and enhancer sequences that control *Crhr1* expression are located, was obtained (Riken, RNB2-336H12). There are no other sequences within this 196kb DNA clone have been annotated as coding sequences for genes other than *Crhr1*. (B) A transgene containing 5' (blue) and 3' (magenta) targeting sequences, a bicistronic iCre 2A fused tdTomato (red) sequence, 3' polyA/WPRE stabilizing sequence, and a F3 flanked neomycin resistance sequence (yellow) was constructed then transformed into E.Coli containing the RNB2-336H12 BAC construct. (C) Using recombineering techniques we isolated BAC clones in which targeted insertion of the transgene at the translation start site of *Crhr1* (ATG) was confirmed by PCR/sequencing. A single Bacterial clone containing the transgene inserted BAC was sent to the UNC transgenic facility where BAC DNA was purified and injected into single cell, fertilized rat oocytes. Two independent rat lines were recovered in which the entire BAC sequence (confirmed by PCR) was inserted into genomic DNA, of which one line displayed transgenic expression in a pattern representative of known *Crhr1* expression patterns.

sequences stabilize the mRNA to achieve more robust expression (Glover et al., 2002). To insert the iCre-p2A-tdTomato cassette into the BAC, we transformed bacterial cells that contain the BAC with a helper plasmid (Portmage-4) which contains a heatshock inducible element that drives expression of lambda red recombinase and confers chloramphenicol resistance (Liu et al., 2003). These cells were then transformed with the iCre-p2A-<sup>td</sup>Tomato homology arm targeting cassette, after a 15-min heatshock. Cells were selected on kanamycin (for neoR) and colonies were screened by colony PCR for accurate insertion of the cassette. Confirmed inserted BAC DNA was then purified transformed into EL250 cells that contained an arabinose inducible flipase construct that were grown in L-arabinose for 1 hr. The transformation was selected on ampicillin (the resistance of the BAC) and screened for loss of kanamycin resistance. Colonies were screened with original (5') and new (flipped out neo) PCR products. Cells containing final inserted BAC construct were sent to the University of North Carolina (UNC) Transgenic Core, where the final BAC were purified and checked for integrity by DNA laddering with EcoR1 and XbaI and pulsed-gel electrophoresis as well as PCR, before being used to generate transgenic rat founders.

*Generation of transgenic rats:* Animals were generated at the UNC Transgenic Core from rat oocytes injected with purified BAC (**Fig 1D, E**). Tail DNA were subjected to PCR using unique primers that are only present in the BAC transgene. Positive animals were crossed with wild-type Wistar rats to generate F1 offspring for analysis and expansion of the line.

*Subjects for experiments:* Adult male and female CRFR1:Cre-<sup>td</sup>Tomato rats were used in all experiments. Rats bred from the original founder F1 line were group-housed in humidity- and temperature-controlled (22°C) vivaria at UNC, LSUHSC, or UTHSC on a reverse 12 h light/dark cycle (lights off at 7:00 or 8:00 AM) and had *ad libitum* access to food and water. All behavioral

procedures occurred in the dark phase of the light-dark cycle. All procedures were approved by the Institutional Animal Care and Use Committee of the respective institutions at which procedures occurred and were in accordance with National Institutes of Health guidelines.

### **Stereotaxic surgeries**

Rats were anesthetized with isoflurane and mounted into a stereotaxic frame (Kopf Instruments) for all stereotaxic surgeries. The following coordinates (from bregma) were used for bilateral intra-CeA microinjections: -2.5 mm posterior,  $\pm$  4.0 mm lateral, and -8.4 mm ventral for male rats and -2.2 mm posterior,  $\pm$  4.0 mm lateral, and -8.2 mm ventral for female rats. Viral vectors for Cre-dependent expression of Gq-DREADDs or control (see below) were injected into each side of the CeA at a volume of 0.5  $\mu$ L over 5 min and injectors were left in place for an additional 2 min. Viral titers were between  $1.0$ - $1.5 \times 10^{13}$  GC/mL. At the end of surgeries, rats were monitored to ensure recovery from anesthesia and were given a minimum of 4 weeks to recover before the start of procedures. Rats were treated with the analgesic flunixin (2.5 mg/kg, s.c.) and, in some rats, the antibiotic cefazolin (20 mg/kg, i.m.) before the start of surgeries and once the following day.

### **Immunohistochemistry**

Rats were deeply anesthetized with isoflurane and were transcardially perfused with ice-cold phosphate buffered saline (PBS) followed by 4% paraformaldehyde (PFA). Brains were extracted and post-fixed in 4% PFA for 24 h (at 4°C), cryoprotected in 20% sucrose for 48-72 h (at 4°C), and frozen in 2-methylbutane on dry ice. Coronal sections were collected using a cryostat and stored in 0.1% sodium azide in PBS at 4°C until further processing.



*Fos immunofluorescent labeling.* Sections (40  $\mu$ m) containing the CeA were washed 3 x 10 min in PBS and incubated in blocking buffer (2.5% normal goat serum with 0.3% Triton X-100) for 2 hr at RT. Subsequently, sections were incubated in rabbit anti-c-Fos polyclonal antibody (1:1000 in blocking buffer; catalog no. 190289, Abcam, Cambridge, United Kingdom) for 48 hr at 4°C. Sections were then washed 3 x 10 min in PBS and incubated in goat anti-rabbit Alexa Fluor 647 (1:500 in blocking buffer; catalog no. A32733, Invitrogen, Carlsbad, CA) for 2 hr at RT. After 3 x 10 min washes in PBS, sections were mounted on microscope slides and coverslipped with Prolong Gold Antifade Reagent with DAPI (Invitrogen, catalog no. P36935). Sections were imaged using a Keyence (Osaka, Japan) BZ-X800 fluorescent microscope at 20x magnification and Fos<sup>+</sup> cells were quantified manually by a blinded experimenter. Four sections representative of the CeA anterior-posterior axis (~bregma -1.8 to -2.8) from each animal were used for analysis.

*HA-tag immunofluorescent labeling.* Sections (40  $\mu$ m) containing the CeA were washed 3 x 10 min in PBS and incubated in 3% hydrogen peroxide for 5 min. Sections were then washed 3 x 10 min in PBS and incubated in a blocking buffer containing 1% (w/v) bovine serum albumin and 0.3% Triton X-100 in PBS for 1 h at room temperature (RT). Then, sections were incubated in a rabbit anti-HA monoclonal antibody (catalog no. 3724, Cell Signaling, Danvers, MA) for 48 h at 4°C. Sections were then washed for 10 min in TNT buffer (0.1 M Tris base in saline with 0.3% Triton X-100), incubated for 30 min in 0.5% (w/v) Tyramide Signal Amplification (TSA) blocking reagent in 0.1 M Tris base, and incubated for 30 min in ImmPRESS horseradish peroxidase horse anti-rabbit antibody (catalog no. MP-7401, Vector Laboratories, Burlingame, CA) at RT. Following 4 x 5 min washes in TNT buffer, sections were incubated in fluorescein TSA reagent (1:50 in TSA amplification diluent) for 10 min at RT. TSA blocking reagent, fluorescein TSA reagent, and TSA amplification diluent are part of the TSA detection kit (catalog no. NEL701A001KT, Akoya Biosciences, Marlborough, MA). Sections were washed 3 x 10 min in TNT buffer, mounted on

microscope slides, and coverslipped with Prolong Gold Antifade Reagent with DAPI (Invitrogen, catalog no. P36935). Sections were imaged using a Keyence BZ-X800 fluorescent microscope at 2x and 20x magnification.

*<sup>td</sup>Tomato DAB immunostaining:* Because <sup>td</sup>Tomato signal degrades over time, to create a permanent set of slides for anatomical analysis we performed immunohistochemistry to label <sup>td</sup>Tomato protein permanently. Briefly, fixed, free-floating sections (30  $\mu$ m) were incubated overnight in monoclonal rabbit anti-RFP, biotin tagged antibody (1:500; Abcam, catalog no. ab34771). Sections were then washed 3x with PBS and incubated in streptavidin-conjugated peroxidase (DAB-elite kit) for 1 hr. After incubation with streptavidin, sections were washed 2x in PBS, then 2x in 0.1M NaOAc (pH 6.0), then stained in a solution of 0.1M NaOAc (pH 6.0) containing nickel ammonium sulfate (3%) and 5  $\mu$ l of 3% H<sub>2</sub>O<sub>2</sub>. Sections were stained for up to 10 min, then washed 2x in NaOAc (pH 6.0), then in PBS, before being mounted on gelatin coated slides, dehydrated, and coverslipped in DPX. Bright field images were acquired using a Cytation 5 imager (BioTek Instruments, Winooski, VT).

*<sup>td</sup>Tomato and CRF immunofluorescent labeling:* Tissue processing procedures were similar to the immunofluorescent procedures described above. Sections through the amygdala were incubated in antibodies against CRF (anti-CRF, # rc-68, 1:2000, The Salk Institute) and goat-anti-RFP (1:1000; Rockland, catalog no. 200-101-379). Primary antibodies were detected by secondary anti-rabbit antibody conjugated with Alexa-488 and anti-goat antibody conjugated with Alexa-555 (Invitrogen), resulting in <sup>td</sup>Tomato protein being visible as red fluorescence and CRF peptide visible as green fluorescence. High magnification images of the CeA were taken using a Leica (Wetzlar, Germany) Sp5 confocal microscope.

## ***In situ* hybridization**

All solutions were prepared with DEPC treated water and all tools and surfaces were wiped with RNAzap followed by DEPC treated water. Adult CRFR1:Cre (<sup>td</sup>Tomato) rats (3 males and 3 females) were deeply anesthetized with Averti, then transcardially perfused with PBS followed by 4% PFA in PBS. Brains were removed, fixed in 4% PFA at 4°C overnight, then equilibrated in 30% sucrose, sectioned into six series of sections (30 µM, coronal sections) on a frozen sliding microtome (SM 2000R, Leica), and stored in PBS at 4°C. Brain slices were mounted onto glass slides, dried, and went through *in situ* hybridization (ISH) using a RNAscope Multiplex Fluorescent kit v2 (ACDbio, Newark, CA) following the manufacturer's protocol.

## **Slice electrophysiology**

Following rapid decapitation, brains were extracted and sectioned as previously described (Herman & Roberto, 2016). Briefly, brains were placed in ice-cold high sucrose solution containing (in mM): sucrose 206.0; KCl 2.5; CaCl<sub>2</sub> 0.5; MgCl<sub>2</sub> 7.0; NaH<sub>2</sub>PO<sub>4</sub> 1.2; NaHCO<sub>3</sub> 26; glucose 5.0; HEPES 5. Coronal sections (300µm) were prepared on a vibrating microtome (Leica VT1000S, Leica Microsystem) and placed in an incubation chamber with oxygenated (95% O<sub>2</sub>/5% CO<sub>2</sub>) artificial cerebrospinal fluid (aCSF) containing (in mM): NaCl 120; KCl 2.5; EGTA 5; CaCl<sub>2</sub> 2.0; MgCl<sub>2</sub> 1.0; NaH<sub>2</sub>PO<sub>4</sub> 1.2; NaHCO<sub>3</sub> 26; Glucose 1.75; HEPES 5. Slices were incubated for 30 min at 37 °C, followed by a 30 min acclimation at room temperature. Patch pipettes (3-6 MΩ; King Precision Glass Inc., Claremont, CA) were filled with an internal solution containing (in mM): potassium chloride (KCl) 145; EGTA 5; MgCl<sub>2</sub> 5; HEPES 10; Na-ATP 2; Na-GTP 0.2 (for whole cell voltage-clamp recordings) or containing potassium gluconate 145; EGTA 5; MgCl<sub>2</sub> 5; HEPES 10; Na-ATP 2; Na-GTP 0.2 (for whole cell current clamp experimental recordings). Data

acquisition was performed with a Multiclamp 700B amplifier (Molecular Devices, San Jose, CA), low-pass filtered at 2-5 kHz, coupled to a digitizer (Digidata 1550B; Molecular Devices) and stored on a PC using pClamp 10 software (Molecular Devices). Series resistance was continuously monitored and cells with series resistance >15 M $\Omega$  were excluded from analysis. Properties of sIPSCs were analyzed and visually confirmed using a semi-automated threshold detection program (Minianalysis). The frequency of firing discharge was evaluated and visually confirmed using threshold-based event detection analysis in Clampfit 10.2 (Molecular Devices). Experimental drugs were applied by bath application or y tube for focal application.

## Drugs

Clozapine-n-oxide (CNO, NIH Drug Supply Program) was dissolved in 5% DMSO (v/v in saline). CRF was purchased from Tocris Bioscience (Bristol, United Kingdom), dissolved in stock solutions in ultra-pure water, and diluted to final experimental concentration in aCSF.

## Experiment 1: CRFR1 and iCre expression in CeA

The purpose of this experiment was to determine the pattern of CRFR1:Cre-<sup>td</sup>Tomato protein expression and *Crrf1* and *iCre* mRNA expression within the CeA. Coronal brain sections containing the CeA were processed for immunohistochemical DAB labeling of <sup>td</sup>Tomato protein or RNAscope ISH for labeling *Crrf1* and *iCre* mRNA, as described above. A separate set of brain sections containing CeA were processed for immunofluorescent labeling of <sup>td</sup>Tomato and CRF to map the expression pattern of these proteins in the CeA of CRFR1:Cre-<sup>td</sup>Tomato rats. Images were captured using a confocal microscope (model TCS SP5, Leica) and processed with Fiji ImageJ. Coronal sections containing the CeA were identified by neuroanatomical landmarks with reference to a rat brain atlas and captured at 20x magnification at one single focal plane (1  $\mu$ m).

For analysis of *Crfr1* and *iCre* RNAscope images, punctate signals from each channel were quantified separately following the manufacturer's guideline (ACDbio SOP45-006). Cells that had more than 3 puncta were considered positive. At least 3 sections representative of the anterior-posterior axis of the CeA were analyzed in each animal.

## **Experiment 2: Membrane properties, inhibitory synaptic transmission, and CRF sensitivity of CeA CRFR1:Cre<sup>td</sup>Tomato cells**

The purpose of this experiment was to characterize intrinsic properties, inhibitory synaptic transmission, and CRF sensitivity in CRFR1<sup>+</sup> neurons in the CeA. These neurons were identified using fluorescent optics and brief (<2 s) episodic illumination. All labeled neurons were photographed, recorded, and saved. Intrinsic membrane properties were determined in voltage clamp configuration ( $V_{\text{hold}} = -60\text{mV}$ ) using pClamp 10 Clampex software. Current clamp recordings were performed to determine current-voltage (I-V) changes and the firing type of each neuron. Voltage clamp recordings of pharmacologically-isolated GABA<sub>A</sub> receptor-mediated spontaneous inhibitory postsynaptic currents (sIPSCs) were performed with bath application of the glutamate receptor blockers 6,7-dinitroquinoxaline-2,3-dione (DNQX, 20 $\mu\text{M}$ ) and DL-2-amino-5-phosphonovalerate (AP-5, 50  $\mu\text{M}$ ) and the GABA<sub>B</sub> receptor antagonist GCP55845A (1 $\mu\text{M}$ ). Cell-attached recordings were made in close juxtacellular (i.e., membrane intact) cell-attached configuration and only cells with regular spontaneous firing were included in analysis. After a stable baseline period, CRF (200 nM) was applied for a period of 7-10 min and changes in firing were measured and compared to baseline. Experiments were performed in individual slices to ensure that drug application was never repeated in the same slice.

### **Experiment 3: Functional validation of Cre-dependent expression of Gq-DREADD receptors in CeA CRFR1:Cre<sup>-td</sup>Tomato cells**

The purpose of this experiment was to test if CeA CRFR1:Cre<sup>-td</sup>Tomato cells can be activated using chemogenetics via Cre-mediated targeting of Gq-DREADD receptors [hM3D(Gq)] to these cells.

*c-Fos validation.* To test if Cre-dependent expression of Gq-DREADD receptors can stimulate CeA CRFR1:Cre<sup>-td</sup>Tomato cells, CRFR1:Cre<sup>-td</sup>Tomato rats were given bilateral microinjections of AAV8-hSyn-DIO-HA-hM3D(Gq)-IRES-mCitrine (50454-AAV8, Addgene, Watertown, MA) or a control virus (AAV5-hSyn-DIO-EGFP; Addgene, 50457-AAV5) targeting the CeA. Four weeks later, rats were given a systemic CNO injection (4 mg/kg, i.p.) and sacrificed 90 min later. Brain sections (4 sections/rat x 4 rats/group) were processed for c-Fos immunohistochemistry and the percentage of c-Fos<sup>+</sup>tdTomato<sup>+</sup> cells in the CeA was calculated.

*Electrophysiological validation.* To functionally validate Cre-dependent expression of Gq-DREADD receptors in CeA CRFR1:Cre<sup>-td</sup>Tomato cells, CRFR1:Cre<sup>-td</sup>Tomato rats were given bilateral microinjections as described above. After a minimum of four weeks, brain slices of CeA were prepared as described above. CeA neuronal expression of mCitrine and tdTomato were confirmed by fluorescent optics and neurons were targeted for electrophysiological recording. After a stable baseline period, CNO (10  $\mu$ M) was applied and changes in membrane potential and action potential firing were measured and compared to baseline.

#### **Experiment 4: Effects of chemogenetic stimulation of CeA CRFR1:Cre<sup>-td</sup>Tomato cells on nociception and anxiety-like behavior.**

The purpose of these experiments was to test the effects of chemogenetic stimulation of CeA CRFR1 cells on nociception and anxiety-like behavior. Rats were given intra-CeA microinjections of AAV8-hSyn-DIO-HA-hM3D(Gq)-IRES-mCitrine (Addgene, 50454-AAV8; Active Virus) or AAV5-hSyn-DIO-EGFP (Addgene, 50457-AAV5; Control Virus) and were given 4 weeks for recovery and viral expression (**Fig. 7A**). Please refer to **Figure 7B** for a timeline schematic of this experiment. All rats were habituated to handling before the start of behavioral procedures. On behavioral procedure days, rats were given at least 30 min to acclimate to the procedure room.

*Nociception.* Mechanical and thermal nociception were measured using the Von Frey (Pahng et al., 2017) and Hargreaves (Avegno et al., 2018) assays, respectively, as previously described. Briefly, the Von Frey apparatus consists of clear chambers placed on top of a mesh floor. To measure sensitivity to mechanical nociception, each hind paw was perpendicularly stimulated with a Von Frey filament (Electronic Von Frey 38450, Ugo Basile, Gemonio, Italy) calibrated to measure the amount of force applied using the up-down method and the force (g) threshold required to elicit a paw withdrawal response was recorded. Force thresholds were measured twice for each hind paw in alternating fashion, with at least 1 min between measurements, and an average threshold was calculated for each animal. The Hargreaves apparatus consists of clear chambers placed on top of a glass pane suspended above a tabletop. To measure sensitivity to thermal nociception, each hind paw was stimulated by a halogen light heat source (Model 309 Hargreaves Apparatus, IITC Life Sciences, Woodland Hills, CA) and latency (s) for hind paw withdrawal was measured. Withdrawal latencies were measured twice for each hind paw in alternating fashion, with at least 1 min between measurements, and an average withdrawal latency was calculated for each animal.

Baseline paw withdrawal thresholds in the Von Frey assay and withdrawal latencies in the Hargreaves assay were measured over 3 sessions (1 baseline session/day; baseline sessions for each assay occurred on alternating days; **Fig. 7B**) that were each preceded 30 min earlier by a vehicle (5% DMSO in saline, i.p.) pretreatment. After the final baseline session, rats were counterbalanced into CNO (4 mg/kg) or Vehicle (5% DMSO) treatment groups based on paw withdrawal latencies during the 3<sup>rd</sup> (final) Hargreaves baseline session. During Von Frey and Hargreaves test sessions, rats were given CNO (4 mg/kg) or vehicle injections (i.p.) 30 min before the start of testing.

*Anxiety-like behaviors.* One day after Hargreaves testing, rats were tested for anxiety-like behaviors in the elevated plus maze (EPM), open field (OF), and light-dark box (LD) on consecutive days (**Fig. 7B**). Rats were given CNO (4 mg/kg) or vehicle injections (i.p.) 30 min before the start of each test. The EPM and OF tests were performed as previously described (Albrechet-Souza et al., 2020; Fucich et al., 2020). Briefly, the EPM consists of two open and two closed arms elevated 50 cm above the floor. Rats were individually placed in the center of the maze facing an open arm and were given 5 min to explore the maze. Time spent in the open and closed arms of the maze was measured. The OF consists of a square arena with a checkerboard patterned floor (4 x 4 squares). Rats were individually placed in one corner of the arena and were given 5 min to explore the arena. Time spent in the periphery and the center of the arena (defined as the 3 x 3 squares in the center of the arena) was measured. The LD box consists of a two compartments; one with black walls and a black floor, and the other with white walls and a white floor. The black compartment was protected from light (dark box) and the white compartment was illuminated (light box; ~1000 lux). Rats were able to freely explore both dark and light boxes through an opened door. Rats were individually placed in the dark box and were given 5 min to



explore the apparatus. Time spent in dark and light boxes, as well as the latency to enter the light box were measured. EPM, OF, and LD tests were recorded via a camera mounted above the apparatus and videos were scored by an experimenter blinded to treatment groups. At the end of the experiment, rats were sacrificed and brain sections were analyzed for virus placement.

## **Statistical analyses**

Electrophysiology data on frequency and amplitude of spontaneous inhibitory postsynaptic currents (sIPSCs) were analyzed and manually confirmed using a semi-automated threshold-based detection software (Mini Analysis, Synaptosoft Inc., Decatur, GA). Cell-attached firing discharge data were analyzed and manually confirmed using a semi-automated threshold-based detection software (Clampfit 10.6, Molecular Devices). Electrophysiological characteristics were determined from baseline and experimental drug application containing a minimum of 65 events each. Event data were represented as mean  $\pm$  SEM or mean % change from baseline  $\pm$  SEM and analyzed for independent significance using a one-sample t-test, compared by paired or unpaired t-test where appropriate. Data analysis and visualization were completed using Prism 7.0 (GraphPad, San Diego, CA). Behavioral data were analyzed using multifactorial ANOVAs. Between-subjects' factors include sex and treatment, and the within-subjects' factor (for Von Frey and Hargreaves tests) was test session (i.e., baseline, test). Data from the active and control virus groups were analyzed separately (i.e., the control virus group was treated as a replication of the experiment; Weera et al., 2021). Data from experiments that only have two groups (e.g., c-Fos immunohistochemistry) were analyzed using t-tests. Data were analyzed using the Statistical Package for Social Sciences (Version 25, IBM Corporation, Armonk, NY). Statistical significance was set at  $p < 0.05$ .

## Results

### Experiment 1: *iCre* (<sup>td</sup>Tomato) is expressed in CRFR1-expressing cells in the CeA

The purpose of this experiment was to determine the pattern of CRFR1:Cre-<sup>td</sup>Tomato protein expression and *Crfr1* and *iCre* mRNA expression within the CeA. Immunohistochemical labeling of <sup>td</sup>Tomato in the amygdala showed that <sup>td</sup>Tomato<sup>+</sup> cells were located in the lateral, basolateral, central, and medial amygdala (**Fig. 2A**). Within the CeA, <sup>td</sup>Tomato<sup>+</sup> cells were found to be concentrated in the CeAm, whereas the CeAl was largely devoid of <sup>td</sup>Tomato<sup>+</sup> cells (**Fig. 2B**).

RNAscope ISH probing of *Crfr1* and *iCre* mRNA showed strong expression of these molecules within the CeAm (**Fig. 2C-G**). Since previous work (e.g., Justice et al., 2008) and our data show that CRFR1<sup>+</sup> cells are largely localized to the CeAm, analysis of *Crfr1* and *iCre* mRNA expression was focused on this subregion. Quantification of *Crfr1*- and *iCre*-expressing cells within the CeAm showed that more than 90% of *Crfr1*-expressing cells co-express *iCre* (**Fig. 2H, I**). There were no significant sex differences in the number of *Crfr1*<sup>+</sup>, *Cre*<sup>+</sup>, and *Crfr1*<sup>+</sup>/*Cre*<sup>+</sup> cells, but there was a trend for more *Crfr1*<sup>+</sup> cells in the CeAm of male rats ( $p = 0.07$ ).

Previous work showed that CeA CRF<sup>+</sup> cells are concentrated in the CeAl, whereas CRFR1<sup>+</sup> cells are mostly located in the CeAm (Day et al., 1999; Jolkkonen and Pitkanen, 1998; Justice et al., 2008; Pomrenze et al., 2015). Immunofluorescent labeling of CRF and <sup>td</sup>Tomato protein in the CeA of CRFR1:Cre-<sup>td</sup>Tomato rats shows that the topography of CRF<sup>+</sup> and <sup>td</sup>Tomato<sup>+</sup> (CRFR1:Cre) cells in these rats is consistent with previous studies (**Fig. 3**).

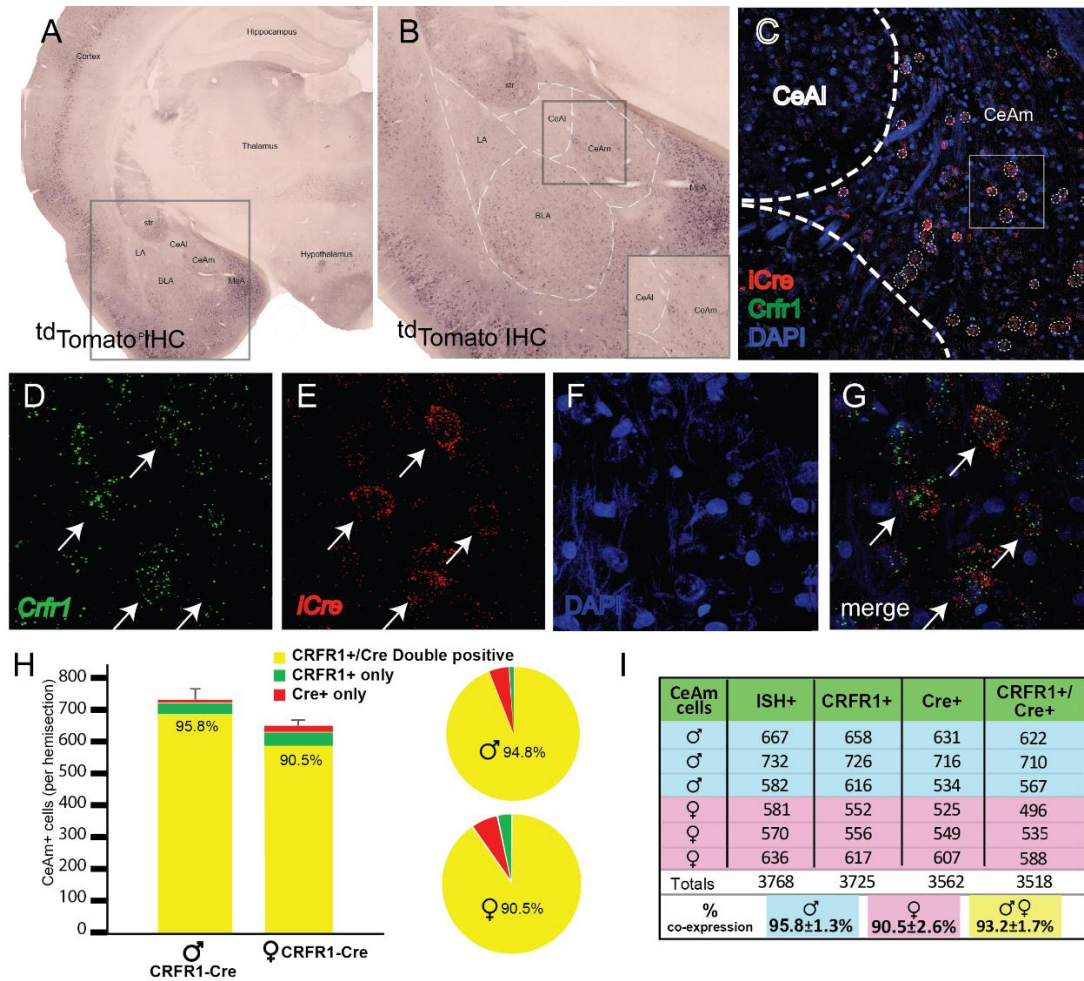

**Figure 2. Validation of transgenic expression of *iCre*/<sup>td</sup>*Tomato* in CRFR1 expressing neurons located in the medial central nucleus of the amygdala (CeAm). (A)** A low magnification image of a section containing the amygdala from a CRFR1:Cre rat, immunohistochemically labeled for <sup>td</sup>*Tomato*. Expression of the CRFR1:Cre transgene is broadly very similar to previous reports of CRFR1 expression in both rat and mouse. **(B)** Within the boxed region of panel A, higher magnification reveals CRFR1 positive cells in the lateral amygdala (LA), basolateral amygdala (BLA), medial portion central amygdala (CeAm), and medial amygdala (MeA). The lack of significant labeling in the CeAl is consistent with reports using both *in situ* hybridization and transgenic reporters to detect CRFR1 expression. **(C)** Micrograph of the CeA from the region boxed in panel B allows visualization of mRNA encoding *iCre* (red) and *Crfr1* (green) along with nuclei stained with DAPI (blue). **(D-G)** Higher magnification images of the boxed region in (C) allows visualization of mRNA for *Crfr1* (D, green), and *iCre* (E, red), with nuclei visualized by DAPI staining (F). **(G)** Merged images reveals that many CeAm neurons that are positive for *Crfr1* mRNA are also positive for *iCre* mRNA (arrows point to double positive neurons). Quantification of coincidence of *in situ* hybridization for both *Crfr1* and *iCre* mRNAs demonstrates that >90% of *Crfr1* positive cells are also positive for *iCre* in the CeAm (n=3). **(H)** Graphical representation of quantification of coincident labeling, or **(I)** a table of the precise counts from each of 3 male and 3 female CRFR1:Cre transgenic animals. We observed greater than 90% of neurons positive for both *Crfr1* and *iCre* in the CeAm.

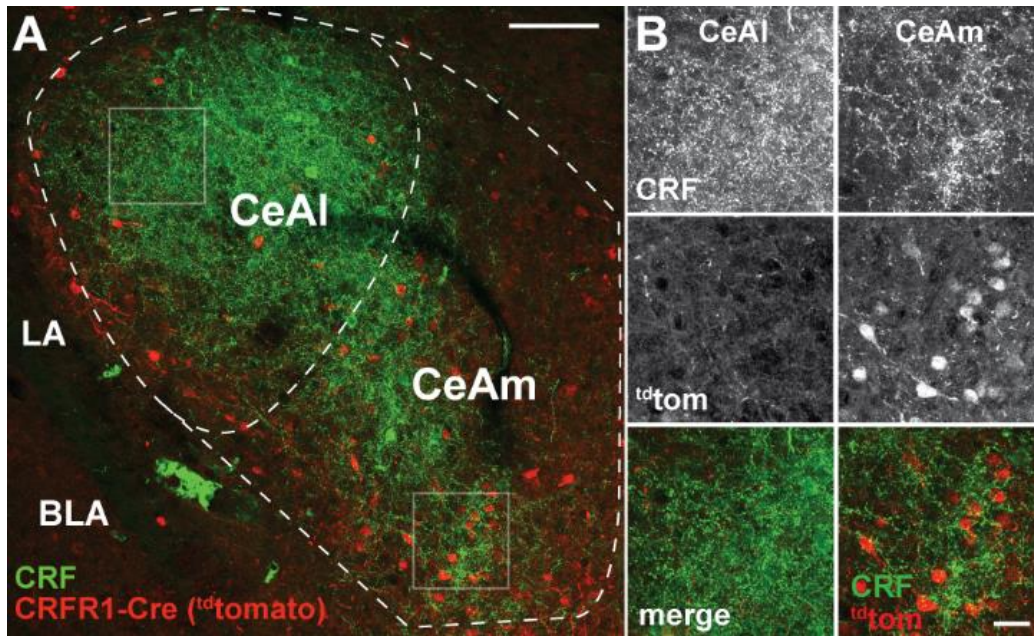

**Figure 3. CRFR1 driven expression of Cre<sup>tdTomato</sup> in the CeA.** (A) Visualization of CRF using immunofluorescent labeling (green) in a rat carrying the CRFR1-Cre2aTom transgene (red) reveals minimal cellular expression of CRFR1 in the lateral central nucleus of the amygdala (CeAl) where CRF is highly abundant. This discrepancy in CRF localization compared to CRFR1 expression is consistent with previous reports of CRFR1 expression in both rat and mouse. In contrast to the CeAl, the medial central nucleus of the amygdala (CeAm) contains many CRFR1 positive neurons (reported by the CRFR1-Cre2aTom transgene), in contact with puncta positive for CRF peptide. (B) High resolution images from the boxed regions of CeAl and CeAm in panel A. CRF staining is dense in both the CeAl and CeAm (top panels), however cellular expression of the CRFR1-Cre2aTom transgene is low in the CeAl, while many neurons in the CeAm are positive for CRFR1 expression (middle panels). Merged images (lower panels) display the coincident staining of CRFR1 positive neurons with CRF puncta in the CeAm, suggesting that stress driven CRF release directly signals to CRFR1+ neurons in the CeAm to modulate neural excitability to influence the output of CeAm neurons. LA – lateral amygdala, BLA – Basolateral amygdala.

## Experiment 2: Electrophysiological characterization of CeA CRFR1:Cre<sup>-td</sup>Tomato neurons

*Membrane properties and inhibitory transmission.* <sup>td</sup>Tomato positive CRFR1-containing (CRFR1<sup>+</sup>) neurons were identified and differentiated from unlabeled CeA neurons using fluorescent optics and brief (<2 s) episodic illumination in slices from adult male and female CRFR1:Cre<sup>-td</sup>Tomato rats. Consistent with immunohistochemical studies (**Fig. 3**) the majority of CRFR1<sup>+</sup> neurons were observed in the medial subnucleus of the CeA (CeAm) and this region was targeted for recordings. Passive membrane properties were determined during online voltage-clamp recordings using a 10 mV pulse delivered after break-in and stabilization. The resting membrane potential was determined online after breaking into the cell using the zero current ( $I = 0$ ) recording configuration. No differences were observed between male and female membrane properties including membrane capacitance, membrane resistance, decay time constant, or resting membrane potential (**Fig. 4A**). CRFR1<sup>+</sup> CeA neurons were then placed in current clamp configuration and a depolarizing step protocol was conducted to allow cell-typing based on previously described firing properties (Chieng et al. 2006; Herman & Roberto, 2016). The majority of CRFR1<sup>+</sup> CeA neurons were of the low-threshold bursting type (**Fig. 4B**). Voltage-clamp recordings of pharmacologically-isolated GABA<sub>A</sub> receptor-mediated spontaneous inhibitory postsynaptic currents (sIPSCs) revealed that CRFR1<sup>+</sup> neurons are under a significant amount of phasic inhibition (**Fig 4C**) with no significant sex differences in sIPSC frequency (**Fig 4D, left**) or sIPSC amplitude (**Fig 4D, right**). These data indicate that male and female CRFR1<sup>+</sup> CeA neurons have similar basal membrane properties and are under similar levels of basal inhibitory transmission.

*CRF sensitivity.* Spontaneous firing activity was recorded in CRFR1<sup>+</sup> CeA neurons from male and female CRFR1:Cre<sup>-td</sup>Tomato rats using the cell-attached configuration. After a stable baseline period of regular firing was established, CRF (200 nM) was focally applied and the firing activity

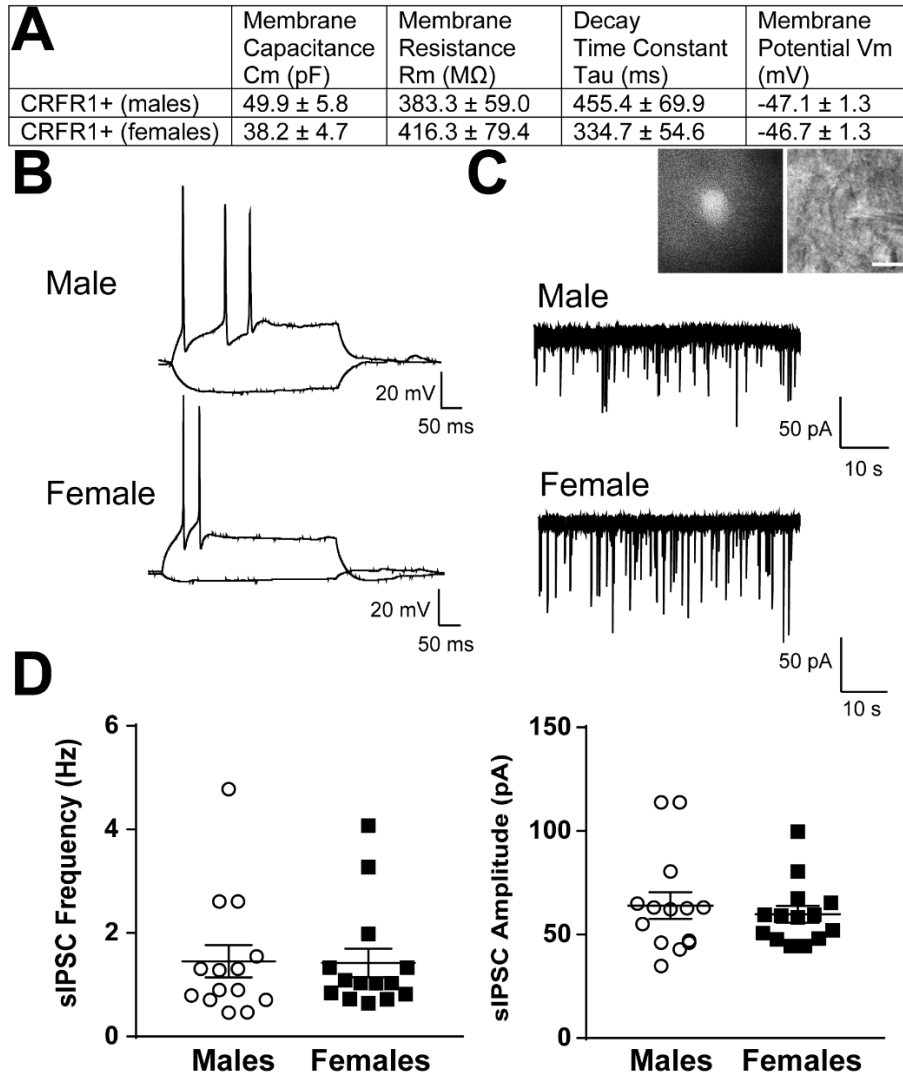

**Figure 4. Basal membrane properties and inhibitory synaptic transmission in CeAm CRFR1:Cre<sup>td</sup>Tomato neurons.** (A) Basal membrane properties (Membrane Capacitance, Cm; Membrane Resistance, Rm; Decay Constant, Tau; Membrane Potential, Vm) from male and female CRFR1<sup>+</sup> CeAm neurons. (B) Representative current-evoked spiking properties from male (top) and female (bottom) CRFR1<sup>+</sup> CeAm neurons. (C) Basal spontaneous inhibitory postsynaptic currents (sIPSCs) from male (top) and female (bottom) CRFR1<sup>+</sup> CeAm neurons (right). *Inset*: representative fluorescent (left) and infrared differential interference contract (IR-DIC, right) image of a CRFR1<sup>+</sup> CeAm neuron targeted for recording. Scale bar = 20  $\mu$ m. (D) Average sIPSC frequency (left) and sIPSC amplitude (right) from male and female CRFR1<sup>+</sup> CeAm neurons.

was recorded for a sustained application period of 7-12 min. CRFR1<sup>+</sup> CeA neurons from male rats had an average baseline firing rate of  $2.1 \pm 0.5$  Hz and focal application of CRF significantly increased the firing activity to  $3.4 \pm 0.7$  Hz ( $t = 3.5$ ,  $p = 0.011$ ; **Fig. 5A and 5C**). CRFR1<sup>+</sup> CeA neurons from female rats had an average baseline firing rate of  $0.8 \pm 0.2$  Hz and focal application of CRF significantly increased the firing activity to  $1.3 \pm 0.3$  Hz ( $t = 3.1$ ,  $p = 0.016$  by paired t-test; **Fig. 5B and 5D**). When firing activity was normalized to baseline values, CRF application significantly increased firing in CRFR1<sup>+</sup> CeA neurons from male rats to  $192.3 \pm 25.6$  % of Control ( $t = 3.6$ ,  $p = 0.009$ ; **Fig. 5E**) and significantly increased firing in CRFR1<sup>+</sup> CeA neurons from female rats to  $166.5 \pm 13.9$  % of Control ( $t = 4.8$ ,  $p = 0.002$ ; **Fig. 5E**) with no significant difference in the change in firing in response to CRF between male and female CRFR1<sup>+</sup> neurons.

### **Experiment 3: Targeting of Cre-dependent Gq-DREADDs to the CeA increases c-Fos<sup>+</sup> CRFR1:Cre<sup>-td</sup>Tomato cells and CeA CRFR1:Cre<sup>-td</sup>Tomato cell activity following CNO treatment**

*c-Fos immunohistochemistry.* Four weeks after CRFR1:Cre<sup>-td</sup>Tomato male and female rats were given intra-CeA microinjections of AAV8-hSyn-DIO-HA-hM3D(Gq)-IRES-mCitrine (Active Virus) or AAV5-hSyn-DIO-EGFP (Control Virus), rats were given an injection (i.p.) of CNO (4 mg/kg) and were sacrificed 90 min later. Brain sections containing the CeA were processed for c-Fos immunohistochemistry and the number of c-Fos<sup>+</sup>tdTomato cells were quantified. An overwhelming majority of tdTomato cells were located in the CeAm as shown above (**Fig. 3**). Therefore, quantification of c-Fos and tdTomato cells was focused on this subregion. We found that rats in the active virus group had a higher percentage of c-Fos<sup>+</sup>tdTomato cells than rats in the control virus group ( $t = 7.1$ ,  $p < 0.001$ ; **Fig. 6A, B**).

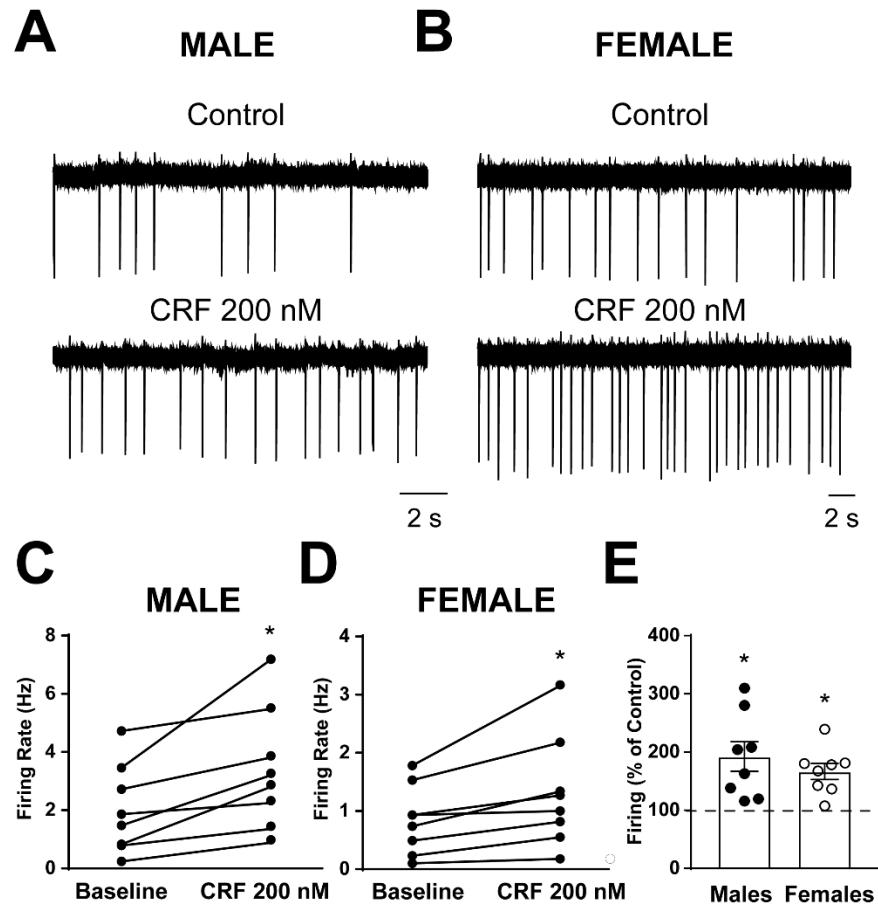

**Figure 5. Spontaneous firing activity and CRF sensitivity of CeAm CRFR1:Cre-<sup>td</sup>Tomato neurons.** (A) Representative cell-attached recording of spontaneous firing activity in a CRFR1<sup>+</sup> CeAm neuron from a male CRFR1:Cre-<sup>td</sup>Tomato rat before and during CRF (200 nM) application. (B) Representative cell-attached recording of spontaneous firing activity in a CRFR1<sup>+</sup> CeAm neuron from a female CRFR1:Cre-<sup>td</sup>Tomato rat before and during CRF (200 nM) application. (C) Summary of changes in spontaneous firing activity with CRF application in CRFR1<sup>+</sup> CeAm neurons from male CRFR1:Cre-<sup>td</sup>Tomato rats.\*p<0.05 by paired t-test. (D) Summary of changes in spontaneous firing activity with CRF application in CRFR1<sup>+</sup> CeAm neurons from female CRFR1:Cre-<sup>td</sup>Tomato rats.\*p<0.05 by paired t-test. (E) Normalized change in firing activity in CRFR1<sup>+</sup> CeAm neurons from male and female CRFR1:Cre-<sup>td</sup>Tomato rats.\*p<0.05 by one-sample t-test.



*Slice electrophysiology.* Coronal sections containing the CeA were prepared from male and female CRFR1:Cre-<sup>td</sup>Tomato rats >4 weeks after rats were given intra-CeA microinjections of AAV8-hSyn-DIO-HA-hM3D(Gq)-IRES-mCitrine. <sup>td</sup>Tomato<sup>+</sup> and mCitrine<sup>+</sup> neurons were identified by brief episcopic illumination using fluorescent optics and positively-identified neurons were targeted for recording in whole-cell current clamp configuration to measure changes in resting membrane potential and spontaneous firing. CNO (10  $\mu$ M) significantly increased membrane potential and number of action potentials in both male ( $t = 4.3$ ,  $p = 0.002$ ;  $t = 2.6$ ,  $p = 0.030$ , respectively; **Fig. 6C** and **6D**) and in female CRFR1<sup>+</sup> mCitrine<sup>+</sup> neurons in the CeA ( $t = 3.2$ ,  $p = 0.016$ ;  $t = 3.6$ ,  $p = 0.006$ , respectively ; **Fig. 6E** and **6F**), suggesting that hM3Dq(Gq) receptor expression was functional and could be stimulated by CNO application with no sex differences in expression or agonist sensitivity.

#### **Experiment 4: Chemogenetic stimulation of CeA CRFR1:Cre-<sup>td</sup>Tomato cells increases mechanical nociception and anxiety-like behaviors**

Rats were given intra-CeA microinjections of a viral vector for Cre-dependent expression of Gq-DREADD receptors (AAV8-hSyn-DIO-HA-hM3D(Gq)-IRES-mCitrine) or control fluorophore (AAV5-hSyn-DIO-EGFP) (**Fig. 7A**). Behavioral procedures began  $\geq 4$  weeks later (**Fig. 7B**).

*Nociception.* In the Von Frey test of mechanical nociception, CNO treatment decreased paw withdrawal thresholds in rats that have hM3D(Gq) expression targeted to CeA CRFR1<sup>+</sup> cells [test x treatment interaction ( $F_{1,13} = 14.0$ ,  $p = 0.002$ ). There was a significant effect of test within the CNO group only ( $F_{1,7} = 38.0$ ,  $p < 0.001$ )], suggesting that chemogenetic stimulation of CeA CRFR1<sup>+</sup> cells increases mechanical sensitivity. CNO treatment had no effect on paw withdrawal thresholds in rats that received the control EGFP fluorophore (**Fig. 7C**). In the Hargreaves test of

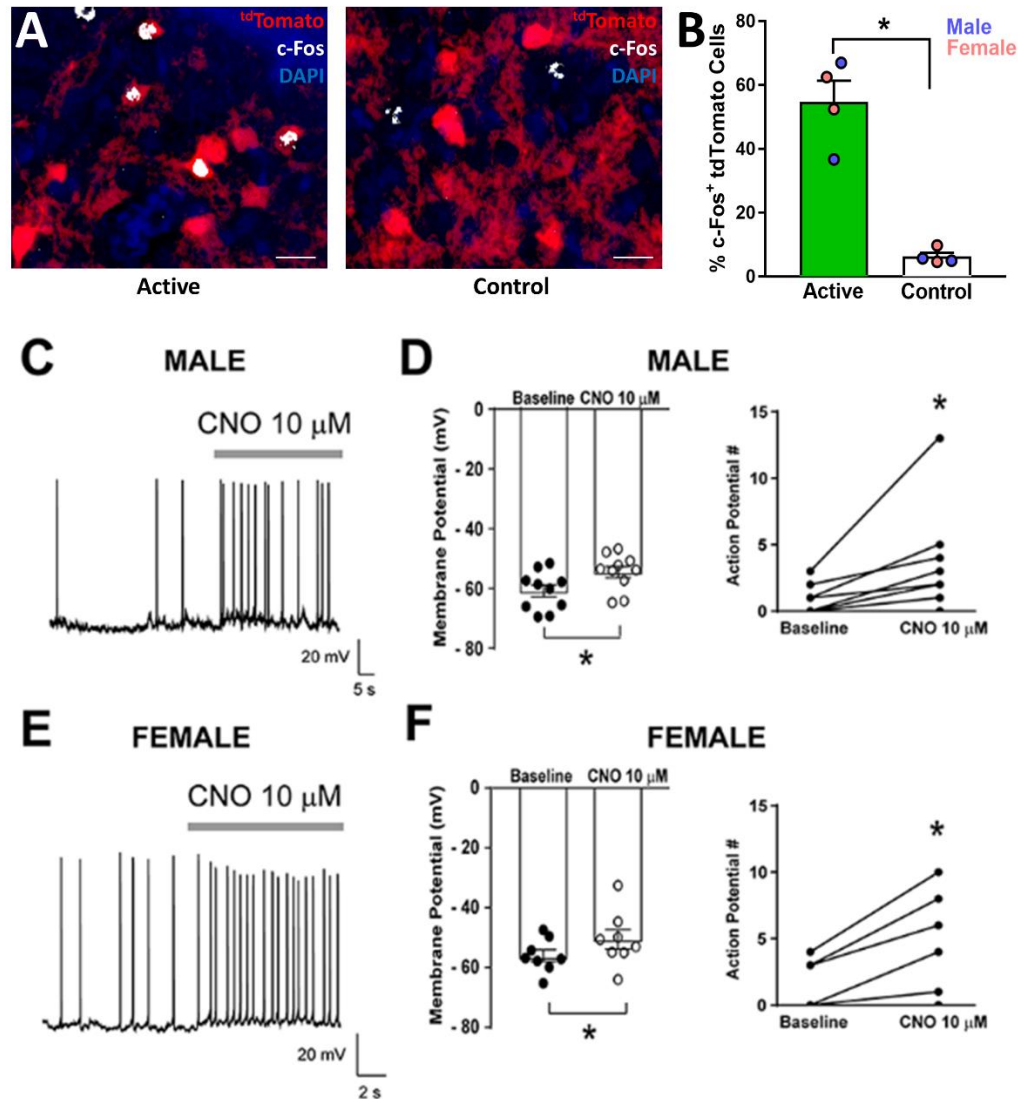

**Figure 6. Validation of DREADD expression and function in CeA CRFR1:Cre-tdTomato neurons.** (A) Representative images of CRFR1:Cre-tdTomato cells (red) and c-Fos immunostaining (white) in CeAm of rats that were given intra-CeA microinjections of AAV8-hSyn-DIO-HA-hM3D(Gq)-IRES-mCitrine (active virus) or AAV5-hSyn-DIO-EGFP (control virus). Scale bar: 50  $\mu$ m. (B) CNO treatment 90 min before sacrifice increased the percentage of c-Fos<sup>+</sup> tdTomato cells in CeAm of rats that were given active virus compared to rats that were given control virus microinjections. \* $p < 0.05$ . (C) Representative whole-cell current clamp recording of membrane potential and firing activity in a CRFR1<sup>+</sup> CeAm neuron from a male CRFR1:Cre-tdTomato rat before and during CNO (10  $\mu$ M) application. (D) Summary of the change in membrane potential (left) and action potentials (right) in male CRFR1<sup>+</sup> CeAm neurons after CNO application. \* $p < 0.05$  by paired t-test. (E) Representative whole-cell current clamp recording of membrane potential and firing activity in a CRFR1<sup>+</sup> CeAm neuron from a female CRFR1:Cre-tdTomato rat before and during CNO (10  $\mu$ M) application. (F) Summary of the change in membrane potential (left) and action potentials (right) in female CRFR1<sup>+</sup> CeAm neurons after CNO application. \* $p < 0.05$  by paired t-test.

thermal nociception, CNO did not affect paw withdrawal latencies in either the hM3D(Gq) or control EGFP groups (**Fig. 7D**).

*Anxiety-like behaviors.* In the EPM test, in the hM3D(Gq) group, rats that were given CNO treatment had lower open arms time compared to rats that were given vehicle treatment ( $t = 2.6$ ,  $p = 0.022$ ), suggesting that chemogenetic stimulation of CeA CRFR1<sup>+</sup> cells increases anxiety-like behavior on the EPM. Control EGFP virus rats did not show differences in open arms times after CNO treatment (**Fig. 7E**). In the OF field test, hM3D(Gq) rats that were given CNO treatment spent less time in the center of the arena compared to rats that were given vehicle treatment ( $t = 3.3$ ,  $p = 0.006$ ), suggesting that chemogenetic stimulation of CeA CRFR1<sup>+</sup> cells increases anxiety-like behavior in the OF. EGFP control rats did not show differences in time spent in the center of the arena after CNO treatment (**Fig. 7F**). In the LD test, CNO treatment did not produce differences in time spent in the light box in either hM3D(Gq) or EGFP control groups (**Fig. 7G**). There were also no differences in latency to enter the light box (data not shown;  $20.14 \pm 5.63$  s,  $29.38 \pm 10.42$  s,  $23.00 \pm 3.94$  s, and  $16.17 \pm 4.48$  s, respectively, for rats in hM3D(Gq) – Veh, hM3D(Gq) – CNO, EGFP – Veh, and EGFP Virus – CNO groups).

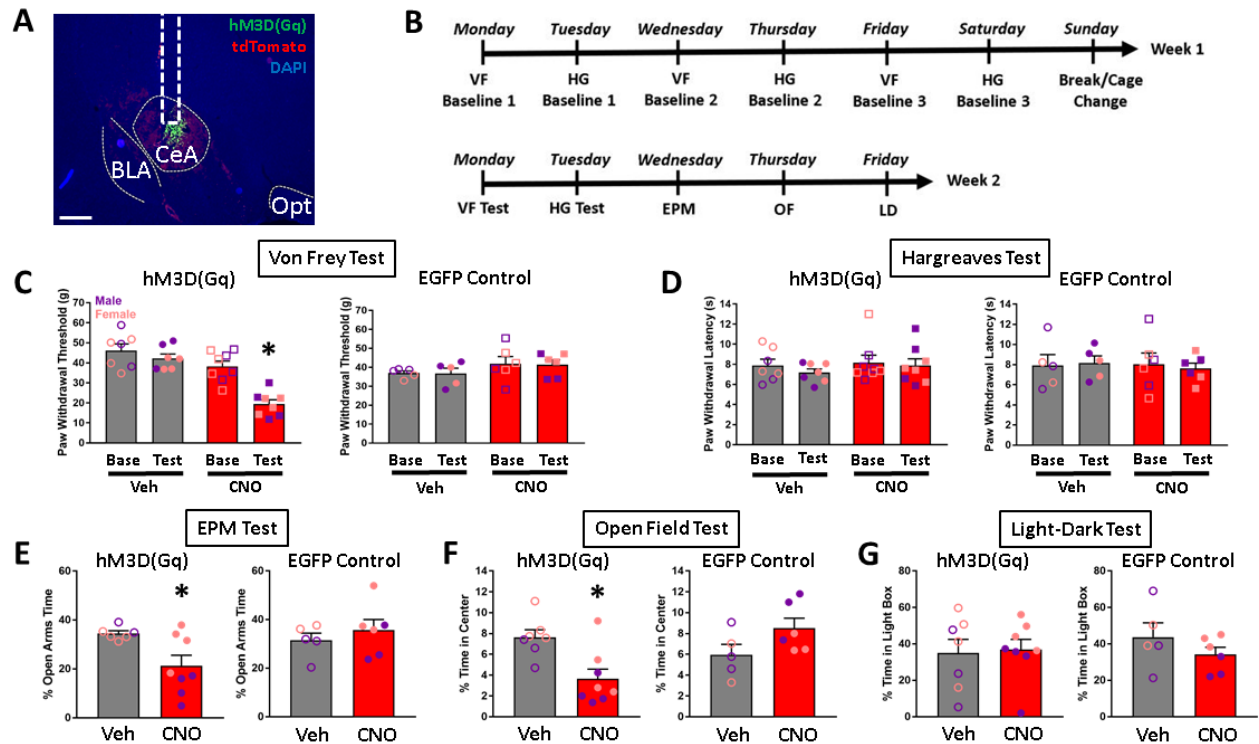

**Figure 7. Effects of chemogenetic stimulation of CeA CRFR1:Cre-tdTomato neurons on nociception and anxiety-like behaviors.** (A) Representative image of AAV8-hSyn-DIO-HA-hM3D(Gq)-IRES-mCitrine expression (green) in the CeA. Scale bar: 500  $\mu$ m. BLA: basolateral amygdala, Opt: optic tract. (B) Timeline of experimental procedures. (C) CNO treatment decreased paw withdrawal thresholds in the Von Frey test of mechanical nociception in rats that were given intra-CeA hM3D(Gq) virus microinjections. There were no effects of treatment on paw withdrawal thresholds in the EGFP control group. (D) CNO treatment had no effects on paw withdrawal latencies in either the hM3D(Gq) or EGFP groups in the Hargreaves test of thermal nociception. (E) CNO treatment decreased the percent time spent in open arms in the EPM test in the hM3D(Gq) group, but had no effect in the EGFP group. (F) CNO treatment decreased the percent time spent in the center of the arena in the OF test in the hM3D(Gq) group, but had no effect in the EGFP group. (G) CNO treatment had no effect on percent time spent in the light box in the LD test. \* $p < 0.05$ .

## Discussion

We generated a new transgenic CRFR1:Cre-<sup>td</sup>Tomato rat line to allow genetic manipulation and visualization of neurons that express CRFR1 in the rat brain. We report that, within the CeA of CRFR1:Cre-<sup>td</sup>Tomato rats, CRFR1:Cre-<sup>td</sup>Tomato cells are located in the medial subdivision (CeAm), consistent with previous reports in rats (Day et al., 1999) and mice (Justice et al., 2008), and that there is strong concordance (> 90%) between *Cfr1* and *iCre* mRNA expression in the CeAm of male and female CRFR1:Cre-<sup>td</sup>Tomato rats. We also characterized the basal membrane properties, inhibitory synaptic transmission, and validated the CRF sensitivity of <sup>td</sup>Tomato-expressing CeA CRFR1<sup>+</sup> cells in male and female rats. In addition, we showed that DREADD receptors [hM3D(Gq)] can be targeted to CeA CRFR1:Cre-<sup>td</sup>Tomato cells using a Cre-dependent expression strategy, that systemic CNO treatment induces c-Fos in DREADD-transfected CRFR1<sup>+</sup> cells in CeA, and that CNO induces membrane depolarization and spontaneous firing activity in DREADD-transfected CRFR1<sup>+</sup> cells in CeA. Finally, we showed that DREADD-mediated stimulation of CeA CRFR1<sup>+</sup> cells increases anxiety-like behavior, as measured by EPM and open field tests, as well as mechanical nociception as measured by the Von Frey test. Collectively, this work provides cellular, electrophysiological, and behavioral data demonstrating the validity and reliability of a new transgenic rat model for the identification and selective manipulation of CRFR1<sup>+</sup> neurons in the CeA.

Previous studies have employed a CRFR1:GFP transgenic mouse model to examine CRFR1 CeA neurons in local CeA microcircuitry (Herman et al., 2013; 2016). Although prior work was conducted in mouse and some species differences would be expected, the electrophysiological properties of CRFR1<sup>+</sup> neurons in the CeA are relatively consistent between the mouse and rat transgenic models. Recent work specifically examining sex differences in CRFR1<sup>+</sup> neurons from CRF1:GFP mice reported similar intrinsic membrane properties, cell-typing, and baseline

inhibitory transmission as reported here and noted no sex differences in basal properties between male and female CRFR1<sup>+</sup> neurons in the CeA (Agoglia et al., 2020), consistent with our current findings. In contrast to previous work, however, we found no sex differences in CRF sensitivity of CRFR1<sup>+</sup> cells in CeA. Although CRF was previously found to increase firing in CRFR1<sup>+</sup> CeA neurons in both male and female mice, CRFR1<sup>+</sup> CeA neurons from male mice displayed a significantly greater increase in firing in response to CRF application (Agoglia et al., 2020). This discrepancy may be driven by differences in sampling size, high variability in male baseline firing rates observed here, sex differences in baseline firing rates observed here, or it may reflect a species difference in sex-dependent sensitivity to CRF. Additional studies are required for a more comprehensive examination of sex- and/or species-specific differences in CRF-stimulated CRFR1<sup>+</sup> neuronal activity in distinct brain regions. CRFR1<sup>+</sup> neurons in the CeA have also previously been implicated in the neuroplastic changes associated with acute and chronic ethanol exposure in mice (Herman et al., 2013; 2016), and future work will determine if this is also the case in rats.

To test the feasibility of using Cre-dependent DREADDs to interrogate the role of CeA CRFR1<sup>+</sup> cells in behavior, we targeted Gq-coupled DREADD receptors [DIO-hM3D(Gq)] to CeA CRFR1:Cre cells and first tested the effects of CeA CRFR1<sup>+</sup> cell stimulation on nociception. We showed that DREADD stimulation of CeA CRFR1<sup>+</sup> cells increases mechanical sensitivity as measured by the Von Frey test, but not thermal sensitivity measured by the Hargreaves test. Numerous studies have implicated CeA CRF-CRFR1 signaling in nociception. For instance, pain induced by carrageenan injection into the knee joint produces hyperactivity of CeA neurons in rats, a phenomenon that is CRFR1 dependent (Ji and Neugebauer, 2007). Conversely, latency for hind limb withdrawal reflex induced by knee joint pressure application is decreased (reflecting hyperalgesia) by CRF infusion into the CeA, a phenomenon that is blocked by co-infusion of a

CRFR1 antagonist (Ji et al., 2013). With regards to mechanical sensitivity, our finding that DREADD activation of CeA CRFR1 neurons produces mechanical hypersensitivity extends previous work showing that ablation or inhibition of CeA CRF neurons blocks neuropathic pain-induced mechanical hypersensitivity, as measured by the Von Frey test (Andreoli et al., 2017). Various studies have also previously reported that CeA CRFR1 antagonism attenuates mechanical hypersensitivity produced by chronic drug or alcohol exposure (e.g., Cohen et al., 2015; Edwards et al., 2012). Our lab has shown that predator odor stress-induced hyperalgesia, as measured by the Hargreaves test, is mediated by increased CRF-CRFR1 signaling in the CeA (Itoga et al., 2016). Contrary to our hypothesis, we did not observe any effect of DREADD activation of CeA CRFR1 cells on thermal sensitivity. It is not clear why CRFR1:Cre rats exhibited mechanical hypersensitivity but not thermal hyperalgesia in this study. It is possible that specific CeA cell populations are involved in specific types of nociceptive processing, or it is possible that the engagement/recruitment of CeA CRFR1<sup>+</sup> cells in mediating specific types of nociception depends on the animal's history or affective state. Using the CRFR1:Cre<sup>-td</sup>Tomato rat line reported here, future work will elucidate the role of specific CRFR1<sup>+</sup> circuits in mechanical and thermal sensitivity (which may or may not be partially overlapping) under basal and challenged conditions such as neuropathic or inflammatory pain, stress exposure and/or withdrawal from chronic exposure to drugs or alcohol.

CeA CRF-CRFR1 signaling generally promotes anxiogenic responses, particularly under challenged conditions such as stress or withdrawal from chronic exposure to drugs of abuse. For instance, in mice, intra-CeA infusion of a CRFR1 antagonist attenuates anxiety-like behavior, as measured by open field and light-dark box tests, following immobilization stress but not under basal conditions (Henry et al., 2006). Similarly, blockade of CRF-CRFR1 signaling in the CeA attenuates alcohol withdrawal-induced anxiety in rats, as measured by the EPM test (Rassnick et

al., 1993). Exposure to stressors (Merlo-Pich et al., 1995) and alcohol withdrawal (Zorrilla et al., 2001) both increase extracellular CRF levels in the CeA. Messing and colleagues used CRF:Cre rats to show that CeA CRF cell activation (using DREADDs) increases anxiety-like behavior and that this effect is blocked by CeA CRF knockdown using RNA interference (Pomrenze et al., 2019). Collectively, these studies show that increased CRF-CRFR1 signaling in CeA, whether produced by stress exposure, drug withdrawal, or the use of viral genetic tools, supports anxiogenesis. Here, we showed that chemogenetic stimulation of CeA CRFR1<sup>+</sup> cells increases anxiety-like behavior, as measured by EPM and open field tests. Interestingly, we did not observe an effect of chemogenetic stimulation of CeA CRFR1<sup>+</sup> cells on light-dark box measures, including time spent in the light vs. dark boxes, latency to enter light box, and number of crosses between the two compartments. Previous studies reported that the light-dark box test may be more suited for detecting anxiolytic rather than anxiogenic effects (Crawley and Davis, 1982), and that animals' responses in this test is affected by the intensity of illumination in the animal's regular housing room (File et al., 2004).

Although the CeA is generally not thought to exhibit strong sexual dimorphism, sex differences have been reported for CRF and CRFR1 properties in the CeA. For example, female rats in proestrus have higher levels of CeA *Crf* mRNA than male rats and footshock stress induces greater CeA *Crf* expression in female proestrus than in male rats (Iwasaki-Sekino et al., 2009). However, using autoradiography, Cooke and colleagues reported no sex differences in CRFR1 binding in the CeA of rats (Weathington et al., 2014). Using a transgenic CRFR1:GFP mouse line, the CeA of male animals was shown to contain more CRFR1<sup>+</sup> cells than female animals (Agoglia et al., 2020). Similarly, using RNAscope *in situ* hybridization, we found that male CRFR1:Cre-<sup>td</sup>Tomato rats tend to have more CRFR1<sup>+</sup> cells within the CeA than female rats. Previous work using CRFR1:Cre-GFP mice (Agoglia et al., 2020) and our current work using CRFR1:Cre-



tdTomato rats revealed no sex differences in basal membrane properties and inhibitory synaptic transmission in CeA CRFR1<sup>+</sup> neurons. Our previous work in CRFR1:GFP mice showed that, while CRF application increased firing in CRFR1<sup>+</sup> CeA neurons from both female and male mice, larger increases were observed in CRFR1<sup>+</sup> neurons from male mice, an effect that we did not observe in rats potentially due to differences in variability or sex differences in firing rate.

The overwhelming majority of published studies examining the role of CeA CRFR1 signaling in nocifensive and anxiety-like behaviors has employed only male subjects. Here, we used both sexes in tests of nociception and anxiety-like behavior and we did not detect any sex differences. However, we observed that the anxiogenic effect of CeA CRFR1<sup>+</sup> cell activation in the EPM test was driven by stronger effects in male subjects. One interpretation is that CeA CRFR1<sup>+</sup> cell activation affects specific components of anxiety-related behavior, that these components are aligned with specific “anxiety-like behavior” phenotypes in male versus female rats that are more or less detectable by these various tests. In support of this idea, a meta-analysis of studies of anxiety-like behavior in rats and mice revealed a discordance in results between the EPM and open field tests (Mohammad et al., 2016). However, due to the small number of studies testing female animals, the role of sex in this discordance is still unknown. Within the EPM literature, studies have shown that the EPM test is more reliable for detecting anxiogenic effects in male rather than female rodents (e.g., Scholl et al., 2019). Collectively, these findings demonstrate the importance of behavioral assay selection and of using both male and female subjects.

In summary, we present a novel CRFR1:Cre<sup>-tdTomato</sup> rat line that provides genetic access to and visual identification of CRFR1-expressing cells. This rat line will be a useful tool for studying the role of distinct CRFR1<sup>+</sup> cell populations and circuits in behavior. In addition, the expression of the

fluorescent reporter <sup>td</sup>Tomato in CRFR1-expressing cells allows for visual identification and mapping of these cells (without the need for viral injection or breeding), and also for targeting of these cells in electrophysiological and behavioral experiments. Future work will validate the fidelity of CRFR1 and Cre-<sup>td</sup>Tomato expression outside the CeA, which will allow for examination of new circuits and behaviors in both physiological and pathological conditions.

### **Acknowledgements**

This work was supported by National Institutes of Health Grants AA023305 (NWG), AA026022 (to NWG and MAH), AA023002 (MAH), AA027145 (MMW), and AA007577 (institutional NRSA training grant that supported MMW). This work was also supported in part by a Merit Review Award #I01 BX003451 (to NWG) from the United States Department of Veterans Affairs, Biomedical Laboratory Research and Development Service.

### **Conflicting Interests**

Dr. Gilpin owns shares in Glauser Life Sciences, Inc., a company with interest in developing therapeutics for mental health disorders. There was no direct link between those interests and the work contained herein.

## References

- Agoglia, A. E., Tella, J., & Herman, M. A. (2020). Sex differences in corticotropin releasing factor peptide regulation of inhibitory control and excitability in central amygdala corticotropin releasing factor receptor 1-neurons. *Neuropharmacology*, *180*, 108296. <https://doi.org/10.1016/j.neuropharm.2020.108296>
- Albrechet-Souza, L., Schratz, C. L., & Gilpin, N. W. (2020). Sex differences in traumatic stress reactivity in rats with and without a history of alcohol drinking. *Biology of Sex Differences*, *11*. <https://doi.org/10.1186/s13293-020-00303-w>
- Andreoli, M., Marketkar, T., & Dimitrov, E. (2017). Contribution of amygdala CRF neurons to chronic pain. *Experimental Neurology*, *298*(Pt A), 1–12. <https://doi.org/10.1016/j.expneurol.2017.08.010>
- Avegno, E. M., Lobell, T. D., Itoga, C. A., Baynes, B. B., Whitaker, A. M., Weera, M. M., Edwards, S., Middleton, J. W., & Gilpin, N. W. (2018). Central amygdala circuits mediate hyperalgesia in alcohol-dependent rats. *The Journal of Neuroscience: The Official Journal of the Society for Neuroscience*. <https://doi.org/10.1523/JNEUROSCI.0483-18.2018>
- Chieng, B. C. H., Christie, M. J., & Osborne, P. B. (2006). Characterization of neurons in the rat central nucleus of the amygdala: Cellular physiology, morphology, and opioid sensitivity. *The Journal of Comparative Neurology*, *497*(6), 910–927. <https://doi.org/10.1002/cne.21025>
- Cohen, A., Treweek, J., Edwards, S., Leão, R. M., Schulteis, G., Koob, G. F., & George, O. (2015). Extended access to nicotine leads to a CRF1 receptor dependent increase in anxiety-like behavior and hyperalgesia in rats. *Addiction Biology*, *20*(1), 56–68. <https://doi.org/10.1111/adb.12077>
- Commons, K. G., Connolley, K. R., & Valentino, R. J. (2003). A neurochemically distinct dorsal raphe-limbic circuit with a potential role in affective disorders. *Neuropsychopharmacology: Official Publication of the American College of Neuropsychopharmacology*, *28*(2), 206–215. <https://doi.org/10.1038/sj.npp.1300045>
- Crawley, J. N., & Davis, L. G. (1982). Baseline exploratory activity predicts anxiolytic responsiveness to diazepam in five mouse strains. *Brain Research Bulletin*, *8*(6), 609–612. [https://doi.org/10.1016/0361-9230\(82\)90087-9](https://doi.org/10.1016/0361-9230(82)90087-9)
- Day, H. E., Curran, E. J., Watson, S. J., & Akil, H. (1999). Distinct neurochemical populations in the rat central nucleus of the amygdala and bed nucleus of the stria terminalis: Evidence for their selective activation by interleukin-1beta. *The Journal of Comparative Neurology*, *413*(1), 113–128.
- Dedic, N., Chen, A., & Deussing, J. M. (2018). The CRF Family of Neuropeptides and their Receptors—Mediators of the Central Stress Response. *Current Molecular Pharmacology*, *11*(1), 4–31. <https://doi.org/10.2174/1874467210666170302104053>
- Duvarci, S., & Pare, D. (2014). Amygdala microcircuits controlling learned fear. *Neuron*, *82*(5), 966–980. <https://doi.org/10.1016/j.neuron.2014.04.042>
- Edwards, S., Vendruscolo, L. F., Schlosburg, J. E., Misra, K. K., Wee, S., Park, P. E., Schulteis, G., & Koob, G. F. (2012). Development of Mechanical Hypersensitivity in Rats During Heroin and Ethanol Dependence: Alleviation by CRF1 Receptor Antagonism. *Neuropharmacology*, *62*(2), 1142–1151. <https://doi.org/10.1016/j.neuropharm.2011.11.006>
- Fadok, J. P., Krabbe, S., Markovic, M., Courtin, J., Xu, C., Massi, L., Botta, P., Bylund, K., Müller, C., Kovacevic, A., Tovote, P., & Lüthi, A. (2017). A competitive inhibitory circuit for selection of active and passive fear responses. *Nature*, *542*(7639), 96–100. <https://doi.org/10.1038/nature21047>

- File, S. E., Lippa, A. S., Beer, B., & Lippa, M. T. (2004). Animal Tests of Anxiety. *Current Protocols in Neuroscience*, 26(1), 8.3.1-8.3.22. <https://doi.org/10.1002/0471142301.ns0803s26>
- Fucich, E. A., Stielper, Z. F., Cancienne, H. L., Edwards, S., Gilpin, N. W., Molina, P. E., & Middleton, J. W. (2020). Endocannabinoid degradation inhibitors ameliorate neuronal and synaptic alterations following traumatic brain injury. *Journal of Neurophysiology*, 123(2), 707–717. <https://doi.org/10.1152/jn.00570.2019>
- Gilpin, N. W., Herman, M. A., & Roberto, M. (2015). The central amygdala as an integrative hub for anxiety and alcohol use disorders. *Biological Psychiatry*, 77(10), 859–869. <https://doi.org/10.1016/j.biopsych.2014.09.008>
- Glover, C. P. J., Bienemann, A. S., Heywood, D. J., Cosgrave, A. S., & Uney, J. B. (2002). Adenoviral-mediated, high-level, cell-specific transgene expression: A SYN1-WPRE cassette mediates increased transgene expression with no loss of neuron specificity. *Molecular Therapy: The Journal of the American Society of Gene Therapy*, 5(5 Pt 1), 509–516. <https://doi.org/10.1006/mthe.2002.0588>
- Henckens, M. J. A. G., Deussing, J. M., & Chen, A. (2016). Region-specific roles of the corticotropin-releasing factor-urocortin system in stress. *Nature Reviews. Neuroscience*, 17(10), 636–651. <https://doi.org/10.1038/nrn.2016.94>
- Henry, B., Vale, W., & Markou, A. (2006). The effect of lateral septum corticotropin-releasing factor receptor 2 activation on anxiety is modulated by stress. *The Journal of Neuroscience: The Official Journal of the Society for Neuroscience*, 26(36), 9142–9152. <https://doi.org/10.1523/JNEUROSCI.1494-06.2006>
- Herman, Melissa A., Contet, C., Justice, N. J., Vale, W., & Roberto, M. (2013). Novel subunit-specific tonic GABA currents and differential effects of ethanol in the central amygdala of CRF receptor-1 reporter mice. *The Journal of Neuroscience: The Official Journal of the Society for Neuroscience*, 33(8), 3284–3298. <https://doi.org/10.1523/JNEUROSCI.2490-12.2013>
- Herman, Melissa A., Contet, C., & Roberto, M. (2016). A Functional Switch in Tonic GABA Currents Alters the Output of Central Amygdala Corticotropin Releasing Factor Receptor-1 Neurons Following Chronic Ethanol Exposure. *The Journal of Neuroscience: The Official Journal of the Society for Neuroscience*, 36(42), 10729–10741. <https://doi.org/10.1523/JNEUROSCI.1267-16.2016>
- Herman, Melissa Ann, & Roberto, M. (2016). Cell-type-specific tonic GABA signaling in the rat central amygdala is selectively altered by acute and chronic ethanol. *Addiction Biology*, 21(1), 72–86. <https://doi.org/10.1111/adb.12181>
- Itoga, C. A., Roltsch Hellard, E. A., Whitaker, A. M., Lu, Y.-L., Schreiber, A. L., Baynes, B. B., Baiamonte, B. A., Richardson, H. N., & Gilpin, N. W. (2016). Traumatic Stress Promotes Hyperalgesia via Corticotropin-Releasing Factor-1 Receptor (CRFR1) Signaling in Central Amygdala. *Neuropsychopharmacology: Official Publication of the American College of Neuropsychopharmacology*, 41(10), 2463–2472. <https://doi.org/10.1038/npp.2016.44>
- Iwasaki-Sekino, A., Mano-Otagiri, A., Ohata, H., Yamauchi, N., & Shibasaki, T. (2009). Gender differences in corticotropin and corticosterone secretion and corticotropin-releasing factor mRNA expression in the paraventricular nucleus of the hypothalamus and the central nucleus of the amygdala in response to footshock stress or psychological stress in rats. *Psychoneuroendocrinology*, 34(2), 226–237. <https://doi.org/10.1016/j.psyneuen.2008.09.003>
- Ji, G., Fu, Y., Adwanikar, H., & Neugebauer, V. (2013). Non-pain-related CRF1 activation in the amygdala facilitates synaptic transmission and pain responses. *Molecular Pain*, 9, 2. <https://doi.org/10.1186/1744-8069-9-2>

- Ji, G., & Neugebauer, V. (2007). Differential effects of CRF1 and CRF2 receptor antagonists on pain-related sensitization of neurons in the central nucleus of the amygdala. *Journal of Neurophysiology*, 97(6), 3893–3904. <https://doi.org/10.1152/jn.00135.2007>
- Jolkkonen, E., & Pitkänen, A. (1998). Intrinsic connections of the rat amygdaloid complex: Projections originating in the central nucleus. *The Journal of Comparative Neurology*, 395(1), 53–72. [https://doi.org/10.1002/\(sici\)1096-9861\(19980525\)395:1<53::aid-cne5>3.0.co;2-g](https://doi.org/10.1002/(sici)1096-9861(19980525)395:1<53::aid-cne5>3.0.co;2-g)
- Justice, N. J., Yuan, Z. F., Sawchenko, P. E., & Vale, W. (2008). Type 1 corticotropin-releasing factor receptor expression reported in BAC transgenic mice: Implications for reconciling ligand-receptor mismatch in the central corticotropin-releasing factor system. *The Journal of Comparative Neurology*, 511(4), 479–496. <https://doi.org/10.1002/cne.21848>
- Liu, P., Jenkins, N. A., & Copeland, N. G. (2003). A highly efficient recombineering-based method for generating conditional knockout mutations. *Genome Research*, 13(3), 476–484. <https://doi.org/10.1101/gr.749203>
- Merlo Pich, E., Lorang, M., Yeganeh, M., Rodriguez de Fonseca, F., Raber, J., Koob, G. F., & Weiss, F. (1995). Increase of extracellular corticotropin-releasing factor-like immunoreactivity levels in the amygdala of awake rats during restraint stress and ethanol withdrawal as measured by microdialysis. *The Journal of Neuroscience: The Official Journal of the Society for Neuroscience*, 15(8), 5439–5447.
- Mohammad, F., Ho, J., Woo, J. H., Lim, C. L., Poon, D. J. J., Lamba, B., & Claridge-Chang, A. (2016). Concordance and incongruence in preclinical anxiety models: Systematic review and meta-analyses. *Neuroscience & Biobehavioral Reviews*, 68, 504–529. <https://doi.org/10.1016/j.neubiorev.2016.04.011>
- Pahng, A. R., Paulsen, R. I., McGinn, M. A., Edwards, K. N., & Edwards, S. (2017). Neurobiological Correlates of Pain Avoidance-Like Behavior in Morphine-Dependent and Non-Dependent Rats. *Neuroscience*, 366, 1–14. <https://doi.org/10.1016/j.neuroscience.2017.09.055>
- Peng, J., Long, B., Yuan, J., Peng, X., Ni, H., Li, X., Gong, H., Luo, Q., & Li, A. (2017). A Quantitative Analysis of the Distribution of CRH Neurons in Whole Mouse Brain. *Frontiers in Neuroanatomy*, 11, 63. <https://doi.org/10.3389/fnana.2017.00063>
- Pomrenze, M. B., Giovanetti, S. M., Maiya, R., Gordon, A. G., Kreeger, L. J., & Messing, R. O. (2019). Dissecting the Roles of GABA and Neuropeptides from Rat Central Amygdala CRF Neurons in Anxiety and Fear Learning. *Cell Reports*, 29(1), 13–21.e4. <https://doi.org/10.1016/j.celrep.2019.08.083>
- Pomrenze, M. B., Millan, E. Z., Hopf, F. W., Keiflin, R., Maiya, R., Blasio, A., Dadgar, J., Kharazia, V., De Guglielmo, G., Crawford, E., Janak, P. H., George, O., Rice, K. C., & Messing, R. O. (2015). A Transgenic Rat for Investigating the Anatomy and Function of Corticotrophin Releasing Factor Circuits. *Frontiers in Neuroscience*, 9, 487. <https://doi.org/10.3389/fnins.2015.00487>
- Rassnick, S., Heinrichs, S. C., Britton, K. T., & Koob, G. F. (1993). Microinjection of a corticotropin-releasing factor antagonist into the central nucleus of the amygdala reverses anxiogenic-like effects of ethanol withdrawal. *Brain Research*, 605(1), 25–32. [https://doi.org/10.1016/0006-8993\(93\)91352-S](https://doi.org/10.1016/0006-8993(93)91352-S)
- Roberto, M., Cruz, M. T., Gilpin, N. W., Sabino, V., Schweitzer, P., Bajo, M., Cottone, P., Madamba, S. G., Stouffer, D. G., Zorrilla, E. P., Koob, G. F., Siggins, G. R., & Parsons, L. H. (2010). Corticotropin releasing factor-induced amygdala gamma-aminobutyric Acid release plays a key role in alcohol dependence. *Biological Psychiatry*, 67(9), 831–839. <https://doi.org/10.1016/j.biopsych.2009.11.007>
- Sanford, C. A., Soden, M. E., Baird, M. A., Miller, S. M., Schulkin, J., Palmiter, R. D., Clark, M., & Zweifel, L. S. (2017). A Central Amygdala CRF Circuit Facilitates Learning about Weak Threats. *Neuron*, 93(1), 164–178. <https://doi.org/10.1016/j.neuron.2016.11.034>

- Scholl, J. L., Afzal, A., Fox, L. C., Watt, M. J., & Forster, G. L. (2019). Sex differences in anxiety-like behaviors in rats. *Physiology & Behavior*, *211*, 112670. <https://doi.org/10.1016/j.physbeh.2019.112670>
- Smith, S. M., & Vale, W. W. (2006). The role of the hypothalamic-pituitary-adrenal axis in neuroendocrine responses to stress. *Dialogues in Clinical Neuroscience*, *8*(4), 383–395.
- Weathington, J. M., Hamki, A., & Cooke, B. M. (2014). Sex- and region-specific pubertal maturation of the corticotropin-releasing factor receptor system in the rat. *The Journal of Comparative Neurology*, *522*(6), 1284–1298. <https://doi.org/10.1002/cne.23475>
- Weera, M. M., Schreiber, A. L., Avegno, E. M., & Gilpin, N. W. (2020). The role of central amygdala corticotropin-releasing factor in predator odor stress-induced avoidance behavior and escalated alcohol drinking in rats. *Neuropharmacology*, *166*, 107979. <https://doi.org/10.1016/j.neuropharm.2020.107979>
- Weera, M. M., Shackett, R. S., Kramer, H. M., Middleton, J. W., & Gilpin, N. W. (2021). Central Amygdala Projections to Lateral Hypothalamus Mediate Avoidance Behavior in Rats. *The Journal of Neuroscience: The Official Journal of the Society for Neuroscience*, *41*(1), 61–72. <https://doi.org/10.1523/JNEUROSCI.0236-20.2020>
- Zorrilla, E. P., Valdez, G. R., & Weiss, F. (2001). Changes in levels of regional CRF-like-immunoreactivity and plasma corticosterone during protracted drug withdrawal in dependent rats. *Psychopharmacology*, *158*(4), 374–381. <https://doi.org/10.1007/s002130100773>
